# Supplementary material for: Opioid Coprescription Through Risk Mitigation Guidance and Opioid Agonist Treatment Receipt
Source: PubMed Central journal article supplement (PMC11096992; doi:10.1001/jamanetworkopen.2024.11389), 2024-05-15
Supplement: jamanetwopen-e2411389-s001.pdf [file jamanetwopen-e2411389-s001.pdf]

## Supplementary Online Content

Min JE, Guerra-Alejos BC, Yan R, et al. Opioid coprescription through risk mitigation guidance and opioid agonist treatment receipt. *JAMA Netw Open*. 2024;7(5):e2411389.  
doi:10.1001/jamanetworkopen.2024.11389

### **eAppendix 1.** Cohort Definition

**eTable 1.** Drug Identification Numbers for Identification of Possible RMG

**eTable 2.** Algorithms to Identify Opioid RMG Exposure

**eTable 3.** Drug Identification Numbers for Identification of OAT

**eTable 4.** Diagnostic Codes Used to Identify Demographic and Medication Use Measures

**eTable 5.** Diagnostic Codes Used to Identify Concurrent Chronic Conditions

**eAppendix 2.** Selection of Empirical Covariates to Calculate High Dimensional Propensity Scores

**eTable 6.** Empirical Covariates Selected for Estimating Effect of Opioid RMG on OAT Receipt in the Month of August 2021

### **eAppendix 3.** Monthly Matching Illustration

**eFigure 1.** Illustration of Constructing Potential Unexposed Groups for Monthly Matching

**eFigure 2.** Distribution of Propensity Scores by Opioid RMG Receipt at Baseline

**eTable 7.** Number of Individuals Before and After Matching per Month From Mar/Apr 2020 to Aug 2021

**eTable 8.** Odds Ratios and 95% Confidence Intervals From the Propensity Score Model on the RMG Initiation for January 2021

**eFigure 3.** Distribution of the Inverse Probability Weights for the Marginal Structural Model Among the hdPS-Matched Cohort

**eTable 9.** Risk Ratios and 95% Confidence Intervals From the Marginal Structural Outcome Models on OAT Receipt Among People on OAT at Time 0

**eTable 10.** The Effect of Opioid RMG Receipt on OAT Receipt Using hdPS-Matched Cohorts Without Weight Truncation

**eFigure 4.** E-Values for the Effect of Opioid RMG on OAT Receipt Using hdPS-Matched Control Among People on OAT at Time 0

**eTable 11.** Sensitivity Analysis on the Alternate Definition of Opioid RMG Receipt for Effect of OAT on Opioid RMG Receipt

### **eReferences**

This supplementary material has been provided by the authors to give readers additional information about their work.

## eAppendix 1. Cohort Definition

Dispensations of opioid RMG were identified from PharmaNet database. As new DINs were not assigned for RMG, we developed algorithms to identify opioid RMG recipients by applying restrictions to our case searches using prescription data including: drug type prescription history, timing, and a list of keywords from the free-form codes up to 80 characters written in the 'directions for use' variable. From possible opioid RMG dispensation records based on drug type (**Table A1**), we constructed RMG episodes using the 'service date' and 'days supplied' fields in the PharmaNet database. Continuous opioid RMG episodes had no interruptions in prescribed doses lasting  $\geq 7$  days(1) . An episode with at least one indication of RMG keywords (**Table A2**) was considered as RMG. We used the definition 2 (higher sensitivity, lower specificity) for the exposure variable.

We made some modifications to the protocol (2) in the keyword searching: (i) keywords were searched for any occurrence in the 'directions for use' field, instead of exact words; (ii) more keywords were added (i.e. *safe drug su, safe consum, clean drug supply, fentan* in Definition 1 and *opioid c* (for *opioid craving*), *opioid replacement, OAT/s, OAT sa, relieve wi, needed for w, pwd, opioid w, opiate w, first dose w, first dose to be wit, one dose w, 1st w, harm* (excluding *pharm*) in Definition 2) to identify more RMG dispensations; (iii) some keywords were dropped (i.e. *emergency, suply, supply, replacement*) because 'emergency supply' (for emergency prescription refills due to expired prescription or out of medication) could be provided not only for RMG dispensation but also for other medications.

We also used PharmaNet to identify individuals who had received opioid agonist treatment (OAT) (**Table A3**).

**eTable 1.** Drug Identification Numbers for Identification of Possible RMG

| Opioid                          | Drug Identification Numbers DIN/PINs                                 |
|---------------------------------|----------------------------------------------------------------------|
| Hydromorphone                   | 2364158, 786543, 2225255, 2192144, 2245705, 2337274, 885428, 2319446 |
| Sustained-release oral morphine | 2019930, 2019949, 2019957, 2019965, 2177749, 2177757                 |

**eTable 2.** Algorithms to Identify Opioid RMG Exposure

|                                                                                                                                                                                                                                                                                                                                                                                                                                                                                                                                                                                                                                                                                                                                                                                                                                                                                                                                                                                                                                                                                                                                                                                                                                                                                                                                                                                                                                                                                                                                                                                                                                                                           |
|---------------------------------------------------------------------------------------------------------------------------------------------------------------------------------------------------------------------------------------------------------------------------------------------------------------------------------------------------------------------------------------------------------------------------------------------------------------------------------------------------------------------------------------------------------------------------------------------------------------------------------------------------------------------------------------------------------------------------------------------------------------------------------------------------------------------------------------------------------------------------------------------------------------------------------------------------------------------------------------------------------------------------------------------------------------------------------------------------------------------------------------------------------------------------------------------------------------------------------------------------------------------------------------------------------------------------------------------------------------------------------------------------------------------------------------------------------------------------------------------------------------------------------------------------------------------------------------------------------------------------------------------------------------------------|
| <p><b>Case Definition 1: Higher specificity lower sensitivity</b><br/>                 For each chemical type, person NOT on RMG medication in the 2 months prior to March 27, 2020, but prescribed medication from March 27, 2020 with one of the following keywords (i.e. substring) occurred in the directions for use variable: <i>corona, cov</i> (excluding <i>cover</i>), <i>crisis, mitigat, pand</i> (for <i>pandemic</i>), <i>pprm, pwm, risk m, riskmitigation, safe s</i> (for <i>safe suppl</i>), <i>safer s, safe drug su, safe+supply, safe consum, clean drug supply, fentan.</i><br/>                 *Exclusion: “pain” in directions for use variable</p> <p><b>Case Definition 2: Higher sensitivity, lower specificity</b><br/>                 For each chemical type, person NOT on RMG medication in the 2 months prior to March 27, 2020, but prescribed medication from March 27, 2020 with one of the keywords (i.e. substring) occurred in the directions for use variable as listed in definition 1 or any of the following substring in the directions for use variable: <i>carr, crav, opioid c</i> (for <i>opioid craving</i>), <i>del</i> (for <i>delivery</i>), <i>distancing, guidan, guideline, illici, interim, isolatio, management, outbreak, overdo, opioid replacement, risk, saf, OAT/s, OAT sa, unwit, no w</i> (for <i>no witness</i>), <i>not wi, withd, withdrawal, relieve wi, needed for w, pwd, opioid w, opiate w, with wi, witness, wittness, dw, first dose w, first dose to be wit, one dose w, 1st w, harm</i> (excluding <i>pharm</i>).<br/>                 *Exclusion: “pain” in directions for use variable</p> |
|---------------------------------------------------------------------------------------------------------------------------------------------------------------------------------------------------------------------------------------------------------------------------------------------------------------------------------------------------------------------------------------------------------------------------------------------------------------------------------------------------------------------------------------------------------------------------------------------------------------------------------------------------------------------------------------------------------------------------------------------------------------------------------------------------------------------------------------------------------------------------------------------------------------------------------------------------------------------------------------------------------------------------------------------------------------------------------------------------------------------------------------------------------------------------------------------------------------------------------------------------------------------------------------------------------------------------------------------------------------------------------------------------------------------------------------------------------------------------------------------------------------------------------------------------------------------------------------------------------------------------------------------------------------------------|

**eTable 3.** Drug Identification Numbers for Identification of OAT

| DIN/PID* in PharmaNet                                                                                                                                                                                                                                                                                  | Description                                       |
|--------------------------------------------------------------------------------------------------------------------------------------------------------------------------------------------------------------------------------------------------------------------------------------------------------|---------------------------------------------------|
| 999792, 999793, 66999990, 66999991, 66999992, 66999993, 66999997, 66999998, 66999999, 67000000, 67000001, 67000002, 67000003, 67000004, 67000005, 67000006, 67000007, 67000008, 67000009, 67000010, 67000011, 67000012, 67000013, 67000014, 67000015, 67000016, 67000017, 67000018, 67000019, 67000020 | DIN/PIN for methadone as OAT                      |
| 2295695, 2295709, 2408090, 2408104, 2424851, 2424878, 2453908, 2453916, 2468085, 2468093, 2502313, 2502321, 2502348, 2502356, 2517175, 2517183                                                                                                                                                         | DIN/PIN for buprenorphine/naloxone as OAT         |
| 22123346, 22123347, 22123348, 22123349                                                                                                                                                                                                                                                                 | DIN/PIN for slow-release morphine (Kadian)        |
| 2483084, 2483092, 2474921, 9858127, 9858128                                                                                                                                                                                                                                                            | DIN/PIN for buprenorphine (Sublocade, Probuphine) |
| 2146126, 22123340, 2469413, 22123357, 66123367                                                                                                                                                                                                                                                         | DIN/PIN for Injectable OAT <sup>†</sup>           |
| 786543, 885428                                                                                                                                                                                                                                                                                         | DIN/PIN for t-IOAT (Hydromorphone)                |

\*Drug Identification Numbers (DIN)/Product Identification Numbers(PIN) <sup>†</sup>Diacetylmorphine or hydromorphone with some restrictions based on prescriber, dispensing pharmacy and/or date.

**eTable 4.** Diagnostic Codes Used to Identify Demographic and Medication Use Measures

| Diseases                                               | Definition and diagnostic code                                                                                                                                                                                                                                                                                                                                                                                                                                                                                                                                                                                                                                                                                                                                                                                                                                                         | Reference                          |           |               |           |     |                    |                        |     |                               |                            |     |                     |                          |     |                     |                             |     |                     |                                |     |                                    |                                        |     |                    |       |
|--------------------------------------------------------|----------------------------------------------------------------------------------------------------------------------------------------------------------------------------------------------------------------------------------------------------------------------------------------------------------------------------------------------------------------------------------------------------------------------------------------------------------------------------------------------------------------------------------------------------------------------------------------------------------------------------------------------------------------------------------------------------------------------------------------------------------------------------------------------------------------------------------------------------------------------------------------|------------------------------------|-----------|---------------|-----------|-----|--------------------|------------------------|-----|-------------------------------|----------------------------|-----|---------------------|--------------------------|-----|---------------------|-----------------------------|-----|---------------------|--------------------------------|-----|------------------------------------|----------------------------------------|-----|--------------------|-------|
| Rural region                                           | Rural or remote; categorized by local health authority (LHA) based on population ( $\leq 40,000$ ) and geographical consideration (proximity to a larger population centres and health services)                                                                                                                                                                                                                                                                                                                                                                                                                                                                                                                                                                                                                                                                                       | (3)                                |           |               |           |     |                    |                        |     |                               |                            |     |                     |                          |     |                     |                             |     |                     |                                |     |                                    |                                        |     |                    |       |
| Income assistance                                      | PharmaCare specialty plan from PharmNet: C (Income Assistance) or receipt of income assistance payment from SDPR                                                                                                                                                                                                                                                                                                                                                                                                                                                                                                                                                                                                                                                                                                                                                                       |                                    |           |               |           |     |                    |                        |     |                               |                            |     |                     |                          |     |                     |                             |     |                     |                                |     |                                    |                                        |     |                    |       |
| Unstable housing                                       | ICD-9 from DAD, MSP: V60.0, V60.1, ICD-10 from DAD: Z59.0, Z59.1 or 3 consecutive months of no fixed address from SDPR                                                                                                                                                                                                                                                                                                                                                                                                                                                                                                                                                                                                                                                                                                                                                                 | (4)                                |           |               |           |     |                    |                        |     |                               |                            |     |                     |                          |     |                     |                             |     |                     |                                |     |                                    |                                        |     |                    |       |
| Physician attachment                                   | Low GP use: visited any GP (or nurse practitioner) less than three times in the past year; single GP $>50\%$ : had three or more GP visits and more than 50% of the visits were to a single GP when receiving core primary care services (MSP).                                                                                                                                                                                                                                                                                                                                                                                                                                                                                                                                                                                                                                        | (5)                                |           |               |           |     |                    |                        |     |                               |                            |     |                     |                          |     |                     |                             |     |                     |                                |     |                                    |                                        |     |                    |       |
| Overdose acute care visits                             | ICD-10 from DAD or NACRS: T40.0, T40.1, T40.2, T40.3, T40.4, T40.5, T40.6, T43.6                                                                                                                                                                                                                                                                                                                                                                                                                                                                                                                                                                                                                                                                                                                                                                                                       |                                    |           |               |           |     |                    |                        |     |                               |                            |     |                     |                          |     |                     |                             |     |                     |                                |     |                                    |                                        |     |                    |       |
| Opioid dispensation for pain                           | Dispensation of codeine, fentanyl, hydromorphone, morphine, oxycodone, sufentanil from PharmaNet                                                                                                                                                                                                                                                                                                                                                                                                                                                                                                                                                                                                                                                                                                                                                                                       |                                    |           |               |           |     |                    |                        |     |                               |                            |     |                     |                          |     |                     |                             |     |                     |                                |     |                                    |                                        |     |                    |       |
| Benzodiazepine dispensation                            | Dispensation of alprazolam, bromazepam, chlordiazepoxide, clobazam, clonazepam, clorazepate, diazepam, flurazepam, ketazolam, lorazepam, midazolam, nitrazepam, oxazepam, temazepam, triazolam from PharmaNet                                                                                                                                                                                                                                                                                                                                                                                                                                                                                                                                                                                                                                                                          |                                    |           |               |           |     |                    |                        |     |                               |                            |     |                     |                          |     |                     |                             |     |                     |                                |     |                                    |                                        |     |                    |       |
| OAT guideline compliance (maximum daily dose per week) | <table border="1"> <thead> <tr> <th></th> <th>Week <math>&lt;4</math></th> <th><math>\geq</math>Week 4</th> </tr> </thead> <tbody> <tr> <td>Methadone</td> <td>Any</td> <td><math>\geq 80\text{mg}</math></td> </tr> <tr> <td>Buprenorphine/naloxone</td> <td>Any</td> <td><math>\geq 16\text{mg}/4\text{mg}</math></td> </tr> <tr> <td>Slow-release oral morphine</td> <td>Any</td> <td><math>\geq 600\text{mg}</math></td> </tr> <tr> <td>Injectable hydromorphone</td> <td>Any</td> <td><math>\geq 200\text{mg}</math></td> </tr> <tr> <td>Injectable diacetylmorphine</td> <td>Any</td> <td><math>\geq 400\text{mg}</math></td> </tr> <tr> <td>Extended-release buprenorphine</td> <td>Any</td> <td>100mg or 300mg Sublocade per month</td> </tr> <tr> <td>Tablet injectable OAT (hydromorphone)*</td> <td>Any</td> <td><math>\geq 80\text{mg}</math></td> </tr> </tbody> </table> |                                    | Week $<4$ | $\geq$ Week 4 | Methadone | Any | $\geq 80\text{mg}$ | Buprenorphine/naloxone | Any | $\geq 16\text{mg}/4\text{mg}$ | Slow-release oral morphine | Any | $\geq 600\text{mg}$ | Injectable hydromorphone | Any | $\geq 200\text{mg}$ | Injectable diacetylmorphine | Any | $\geq 400\text{mg}$ | Extended-release buprenorphine | Any | 100mg or 300mg Sublocade per month | Tablet injectable OAT (hydromorphone)* | Any | $\geq 80\text{mg}$ | (6-9) |
|                                                        | Week $<4$                                                                                                                                                                                                                                                                                                                                                                                                                                                                                                                                                                                                                                                                                                                                                                                                                                                                              | $\geq$ Week 4                      |           |               |           |     |                    |                        |     |                               |                            |     |                     |                          |     |                     |                             |     |                     |                                |     |                                    |                                        |     |                    |       |
| Methadone                                              | Any                                                                                                                                                                                                                                                                                                                                                                                                                                                                                                                                                                                                                                                                                                                                                                                                                                                                                    | $\geq 80\text{mg}$                 |           |               |           |     |                    |                        |     |                               |                            |     |                     |                          |     |                     |                             |     |                     |                                |     |                                    |                                        |     |                    |       |
| Buprenorphine/naloxone                                 | Any                                                                                                                                                                                                                                                                                                                                                                                                                                                                                                                                                                                                                                                                                                                                                                                                                                                                                    | $\geq 16\text{mg}/4\text{mg}$      |           |               |           |     |                    |                        |     |                               |                            |     |                     |                          |     |                     |                             |     |                     |                                |     |                                    |                                        |     |                    |       |
| Slow-release oral morphine                             | Any                                                                                                                                                                                                                                                                                                                                                                                                                                                                                                                                                                                                                                                                                                                                                                                                                                                                                    | $\geq 600\text{mg}$                |           |               |           |     |                    |                        |     |                               |                            |     |                     |                          |     |                     |                             |     |                     |                                |     |                                    |                                        |     |                    |       |
| Injectable hydromorphone                               | Any                                                                                                                                                                                                                                                                                                                                                                                                                                                                                                                                                                                                                                                                                                                                                                                                                                                                                    | $\geq 200\text{mg}$                |           |               |           |     |                    |                        |     |                               |                            |     |                     |                          |     |                     |                             |     |                     |                                |     |                                    |                                        |     |                    |       |
| Injectable diacetylmorphine                            | Any                                                                                                                                                                                                                                                                                                                                                                                                                                                                                                                                                                                                                                                                                                                                                                                                                                                                                    | $\geq 400\text{mg}$                |           |               |           |     |                    |                        |     |                               |                            |     |                     |                          |     |                     |                             |     |                     |                                |     |                                    |                                        |     |                    |       |
| Extended-release buprenorphine                         | Any                                                                                                                                                                                                                                                                                                                                                                                                                                                                                                                                                                                                                                                                                                                                                                                                                                                                                    | 100mg or 300mg Sublocade per month |           |               |           |     |                    |                        |     |                               |                            |     |                     |                          |     |                     |                             |     |                     |                                |     |                                    |                                        |     |                    |       |
| Tablet injectable OAT (hydromorphone)*                 | Any                                                                                                                                                                                                                                                                                                                                                                                                                                                                                                                                                                                                                                                                                                                                                                                                                                                                                    | $\geq 80\text{mg}$                 |           |               |           |     |                    |                        |     |                               |                            |     |                     |                          |     |                     |                             |     |                     |                                |     |                                    |                                        |     |                    |       |

ICD: International Classification of Diseases; DAD: Discharge Abstract Database; MSP: Medical Service Plan; SDPR: Social Development and Poverty Reduction; GP: general practitioner. \* based on median value

**eTable 5.** Diagnostic Codes Used to Identify Concurrent Chronic Conditions

| <b>Diseases</b>                        | <b>Diagnostic code</b>                                                                                                                                                                                                                                                                                                                                                                | <b>References</b> | <b>Validation</b>                                                                                                                                           |
|----------------------------------------|---------------------------------------------------------------------------------------------------------------------------------------------------------------------------------------------------------------------------------------------------------------------------------------------------------------------------------------------------------------------------------------|-------------------|-------------------------------------------------------------------------------------------------------------------------------------------------------------|
| Charlson comorbidity index             | Based on 17 CCI groups using enhanced ICD-9-CM and ICD-10 codes from hospitalization records in DAD in the past year                                                                                                                                                                                                                                                                  | (10), (11)        | Yes, predictive validity on in-hospital mortality(10) and validity of the coding algorithms(12) among in-patients aged 18 or older in Calgary Health Region |
| Chronic Disease score                  | Based on 29 categories using AHFS from medication dispensation records in PharmaNet in the past year                                                                                                                                                                                                                                                                                  | (13)              | Yes, predictive validity on hospitalization and death among people aged 18 or older in Western Washington State(13)                                         |
| Severe mental health disorder          | Includes major depressive disorder, bipolar disorder, and schizophrenia                                                                                                                                                                                                                                                                                                               |                   |                                                                                                                                                             |
| Major depressive disorder <sup>¶</sup> | ICD-9 from DAD, MSP: 296.2, 296.3<br>ICD-10 from DAD, NACRS: F32.1, F32.2, F32.9, F33.1, F33.2, F33.9                                                                                                                                                                                                                                                                                 | (14), (15)        | Yes, using ICD-9 (296.2, 296.3, 300.4, 311)(15-17)                                                                                                          |
| Bipolar disorder <sup>¶</sup>          | ICD-9 from DAD, MSP: 296.4, 296.5, 296.6, 296.7, 296.8<br>ICD-10 from DAD, NACRS: F31                                                                                                                                                                                                                                                                                                 | (18)              | Yes, using the ICD-9 (296.x (0,1,2,3,4,8,9)) and ICD-10 (F30-31) from hospital discharge records in Scandinavia (19, 20)                                    |
| Schizophrenia <sup>±</sup>             | ICD-9 from DAD, MSP: 295<br>ICD-10 from DAD, NACRS: F20.0, F20.1, F20.2, F20.5, F20.8, F20.9                                                                                                                                                                                                                                                                                          | (14), (15), (21)  | Yes, using ICD-10 (F20, F25) and ICD-9 (295) in Canada (15, 21, 22)                                                                                         |
| HIV <sup>*</sup>                       | ICD-9 from DAD and MSP: 042-044, 079.53, 795.8, V08; ICD-10 from DAD and NACRS: B20-B24, B97.35, F02.4, O98.7, Z21; MSP fee item: 13015, 13105, 33645, 36370                                                                                                                                                                                                                          | (23)              | Yes, using ICD-9 (042-044, V08) and ICD-10 (B20-B24, R75, Z21) in British Columbia, Canada(23)                                                              |
| Hepatitis C virus <sup>*</sup>         | ICD-9 from DAD and MSP: 070.4, 070.5, 070.7; ICD-10 from DAD and NACRS: B17.1, B18.2, B19.2; AHFS category: 8:18.40                                                                                                                                                                                                                                                                   | (24), (25), (26)  | Yes, using the ICD-10-CM in a health care system in Taiwan(27)                                                                                              |
| Alcohol use disorder <sup>*</sup>      | ICD-9 from DAD and MSP: 291, 303, 305.0, 357.5, 425.5, 535.3, 571.0-571.3, 655.4, V65.42; ICD-10 from DAD and NACRS: F10, Z50.2, Z71.4, Z72.1, G31.2, G62.1, G72.1, I42.6, K29.2, K70, K86.0, O35.4; DIN: 2293269, 2158655, 2213826, 2444275, 2451883, 2534, 2542, 2041375, 2041391, 66124089, 66124085, 66124087; indication of alcohol use disorder during the pregnancy from BCPDR | (28), (29), (30)  | No                                                                                                                                                          |
| Substance use disorder <sup>*‡</sup>   | ICD-9 from DAD and MSP: 292, 304.x (1-6,8,9), 305.x (2-4,6-9), 648.3, 655.5, 967, 969.x (4,6,7), 970, E851, E852, E853.2, E854.x (1,2,3); ICD-10 from DAD and NACRS: F12-F16, F19, X42, X62, Y12, T40.5, T40.7-T40.9, T42.4, T43.6, Z50.3, Z71.5, Z72.2; indication of substance use during the pregnancy from BCPDR                                                                  | (10, 28)          | Yes, using ICD-10 (F11-F16, F18, F19, Z71.5, Z72.2) and ICD-9-CM (292, 304, 305.2-305.9, V65.42) in-patients aged 18 or older in Calgary Health Region(12)  |

|                            |                                                                                                                                                                                                                                                                                                                                                                                                                                                                                                                                                                                                                                               |                  |                                                                               |
|----------------------------|-----------------------------------------------------------------------------------------------------------------------------------------------------------------------------------------------------------------------------------------------------------------------------------------------------------------------------------------------------------------------------------------------------------------------------------------------------------------------------------------------------------------------------------------------------------------------------------------------------------------------------------------------|------------------|-------------------------------------------------------------------------------|
| Chronic pain* <sup>§</sup> | ICD-9 from DAD and MSP: 338.2, 338.4, 307.80, 307.89, 338.0, 719.41, 719.45-719.47, 719.49, 720.0, 720.2, 720.9, 721.0-721.4, 721.6, 721.8, 721.9, 722, 723.0, 723.1, 723.3-723.9, 724.0-724.6, 724.70, 724.79, 724.8, 724.9, 729.0-729.2, 729.4, 729.5, 350, 352-357, 344.0, 344.1, 997.0, 733.0, 733.7, 733.9, 781; ICD-10 from DAD and NACRS: F45.4, G89.0, G89.2, G89.4, M08.1, M25.50, M25.51, M25.55- M25.57, M43.2-M43.6, M45, M46.1, M46.3, M46.4, M46.9, M47, M48.0, M48.1, M48.8, M48.9, M50.8, M50.9, M51, M53.1-M53.3, M53.8, M53.9, M54, M60.8, M60.9, M63.3, M79.0-M79.2, M79.6, M79.7, M96.1, G50, G52-G64, G82, G97, M89, R29 | , (31), (32, 33) | Yes, using the ICD-9 codes at community health center in Connecticut, USA(31) |
| Tobacco use disorder*      | ICD-9 from DAD and MSP: 305.1, V15.82. ICD-10 from DAD: F17, O99.33, T65.2, Z71.6, Z72.0, Z87.8. PharmaNet: indication of nicotine replacement therapy                                                                                                                                                                                                                                                                                                                                                                                                                                                                                        | (34)             | No                                                                            |
| Cancer*                    | ICD-9 from DAD and MSP: 140-208. ICD-10 from DAD and NACRS: C00-C97.                                                                                                                                                                                                                                                                                                                                                                                                                                                                                                                                                                          | (35, 36)         | No                                                                            |
| Palliative care*           | MSP fee-item: 127, 14063, 36640, 38006, 96163, 96169, 96963, 96969, 114, 115, 9910, 9911, 9912, 13114, 13334, 36355, 36356. ICD-9 from DAD and MSP: V66.7; ICD-10 from DAD: Z51.5. Any PharmaNet records under the PharmaCare plan for palliative care (Plan P).                                                                                                                                                                                                                                                                                                                                                                              | (37)             | No                                                                            |

ICD: International Classification of Diseases; DAD: Discharge Abstract Database; NACRS: National Ambulatory Care Reporting System; MSP: Medical Service Plan; AHFS: American Hospital Formulary Service from PharmaNet; DIN: drug identification number; BCPDR: BC Perinatal data registry. \*To minimize misclassification due to errors in the coding of physician billing records, we applied a case-finding algorithm based on the presence of at least 1 hospitalization, ED visit, BCPDR record, more than 3 physician billing records, or medication receipt for alcohol use disorder; <sup>¶</sup> case-finding algorithm: ≥1 hospitalization, ≥1 ED visits, or ≥2 physician visits in one year; <sup>‡</sup> case-finding algorithm: ≥1 hospitalization, ≥1 ED visits, or ≥2 physician visits at least 30 days apart in two years; <sup>‡</sup>Any indication of non-opioid drug use, poisoning (accidental or intentional), or substance use counselling or rehab, excluding alcohol use disorder; <sup>§</sup>non-cancer

## **eAppendix 2.** Selection of Empirical Covariates to Calculate High Dimensional Propensity Scores

We applied the high-dimensional propensity score (hdPS) algorithm by month to generate 50 empirically-derived covariates specific to each outcome from administrative databases(38). We used 5 data dimensions: 4-digit ICD-10 codes and 5-digit inpatient procedure codes from DAD (hospitalizations), 3-digit ICD-9 codes and 5-digit fee item from MSP (physician visits), and drug dispensed (8-digit TC5; excluding opioid RMG) from Pharmanet databases during a 6-month prior to baseline. In order to identify candidate empirical covariates, we divided each code into three binary variables based on frequency: code occurred  $\geq 1$  times (“once”),  $\geq$  median number of times (“sporadic”), and  $\geq 75^{\text{th}}$  percentile number of times (“frequent”). Then, we chose top 100 most prevalent code in each data dimensions based on frequency of code occurrence, resulting 5 dimensions \* 100 codes \* 3 binary variables=1,500 covariates. Among those covariates, we included the top 50 covariates based on apparent relative risk to combine information from all 5 data dimensions(38). **eTable 6** lists the 50 selected covariates for analysis of effect of opioid RMG on OAT measured on month of August 2021.

**eTable 6.** Empirical Covariates Selected for Estimating Effect of Opioid RMG on OAT Receipt in the Month of August 2021

| Dimension         | Diagnosis code | Frequency | Code Description                                                            |
|-------------------|----------------|-----------|-----------------------------------------------------------------------------|
| ICD-10 from DAD   | B95.6          | Once      | Staphylococcus aureus as the cause of diseases classified to other chapters |
| ICD-10 from DAD   | D50.9          | Once      | Iron deficiency anaemia, unspecified                                        |
| ICD-10 from DAD   | F10.2          | Once      | Mental and behavioural disorders due to use of alcohol: dependence syndrome |
| ICD-10 from DAD   | F10.3          | Once      | Mental and behavioural disorders due to use of alcohol withdrawal state     |
| ICD-10 from DAD   | F11.2          | Once      | Mental and behavioural disorders due to use of opioids: dependence syndrome |
| ICD-10 from DAD   | L03.1          | Once      | Cellulitis of other parts of limb                                           |
| ICD-10 from DAD   | U07.5          | Frequent  | Personal history of COVID-19                                                |
| ICD-10 from DAD   | U07.5          | Once      | Personal history of COVID-19                                                |
| ICD-10 from DAD   | U82.1          | Once      | Resistance to methicillin                                                   |
| ICD-10 from DAD   | U98.9          | Once      | Unspecified place of occurrence                                             |
| ICD-10 from DAD   | Z22.3          | Once      | Carrier of other specified bacterial diseases                               |
| ICD-10 from DAD   | Z59.0          | Once      | Homelessness                                                                |
| ICD-9 from MSP    | 038            | Once      | septicaemia                                                                 |
| ICD-9 from MSP    | 038            | Sporadic  | septicaemia                                                                 |
| ICD-9 from MSP    | 038            | Frequent  | septicaemia                                                                 |
| ICD-9 from MSP    | 285            | Frequent  | other and unspecified anaemias                                              |
| ICD-9 from MSP    | 293            | Frequent  | transient organic psychotic conditions                                      |
| ICD-9 from MSP    | 682            | Once      | other cellulitis and abscess                                                |
| ICD-9 from MSP    | 780            | Frequent  | general symptoms                                                            |
| ICD-9 from MSP    | 780            | Once      | general symptoms                                                            |
| ICD-9 from MSP    | 965            | Once      | poisoning by analgesics, antipyretics and antirheumatics                    |
| Fee item from MSP | 100            | Once      | visit in office (age 2 - 49)                                                |
| Fee item from MSP | 108            | Sporadic  | hospital visit                                                              |
| Fee item from MSP | 108            | Frequent  | hospital visit                                                              |
| Fee item from MSP | 108            | Once      | hospital visit                                                              |
| Fee item from MSP | 109            | Once      | acute care hospital admission visit                                         |
| Fee item from MSP | 116            | Once      | consultation, special in-hospital                                           |
| Fee item from MSP | 1202           | Once      | call-out charge/saturday, sunday, or stat holiday                           |
| Fee item from MSP | 1205           | Once      | surcharge - nonoperative - evening                                          |
| Fee item from MSP | 1207           | Frequent  | surcharge - nonoperative/weekend and stat/holiday                           |
| Fee item from MSP | 1207           | Once      | surcharge - nonoperative/weekend and stat/holiday                           |
| Fee item from MSP | 13008          | Frequent  | community based gp: hospital visit                                          |
| Fee item from MSP | 13008          | Sporadic  | community based gp: hospital visit                                          |
| Fee item from MSP | 13008          | Once      | community based gp: hospital visit                                          |



|                   |          |          |                                                   |
|-------------------|----------|----------|---------------------------------------------------|
| Fee item from MSP | 15039    | Once     | gp poc testing for opioid agonist treatment       |
| Fee item from MSP | 1813     | Once     | level iii emergency care - day                    |
| Fee item from MSP | 1832     | Frequent | level ii emergency care - night                   |
| Fee item from MSP | 1832     | Once     | level ii emergency care - night                   |
| Fee item from MSP | 1833     | Once     | level iii emergency care - night                  |
| Fee item from MSP | 1843     | Once     | level iii emergency care - sat, sun or stat hol   |
| Fee item from MSP | 615      | Once     | hospital/institution inpatient or home visit      |
| Fee item from MSP | 650      | Once     | psychotherapy indiv.(hosp or institut) per 1/2 hr |
| Fee item from MSP | 8692     | Once     | tomography-head scan double scan or 2 planes      |
| Fee item from MSP | 90465    | Once     | blood film review                                 |
| Drug from PNet    | 08120606 | Once     | cephalexin                                        |
| Drug from PNet    | 28080805 | Sporadic | hydromorphone                                     |
| Drug from PNet    | 28080805 | Frequent | hydromorphone                                     |
| Drug from PNet    | 28080805 | Once     | hydromorphone                                     |
| Drug from PNet    | 28080809 | Once     | morphine                                          |
| Drug from PNet    | 28080809 | Sporadic | morphine                                          |

ICD: International Classification of Diseases (9 or 10th Revision); DAD: Discharge Abstract Database for hospitalisations; MSP: Medical Services Plan for physician billing records; PNet: PharmaNet for community pharmacy dispensations. \* frequency:  $\geq 1$  times (“once”),  $\geq$  median number of times (“sporadic”), and  $\geq 75^{\text{th}}$  percentile number of times (“frequent”).

### **eAppendix 3. Monthly Matching Illustration**

Weekly observations were constructed from March 27, 2020 or the first week of OAT receipt, whichever occurred later. Monthly matching was done based on the propensity scores estimated at the first week of opioid RMG receipt among ever RMG recipients and the first week on OAT of each month prior to the month of RMG initiation. We executed matching without replacement using the nearest neighbor matching using a SAS macro version 2 available at: [www.drugepi.org](http://www.drugepi.org).(39) The pairwise nearest neighbour matching computed the best matches based on the distance between each pair of individuals, which would give consistent results independent of any ordering of individuals.(40) We used a caliper of width equal to 0.2 of the standard deviation of the logit of the propensity score(41)

Once selected as an unexposed group in an early month, the person cannot be selected again in the unexposed group in the later months. However, exposed individuals can be selected as an unexposed group prior to their first RMG receipts, and the observations were censored at the RMG receipt.

# eFigure 1. Illustration of Constructing Potential Unexposed Groups for Monthly Matching

## Step 1. Construct a weekly dataset

Individual 1 (RMG initiated and received OAT at month 2)

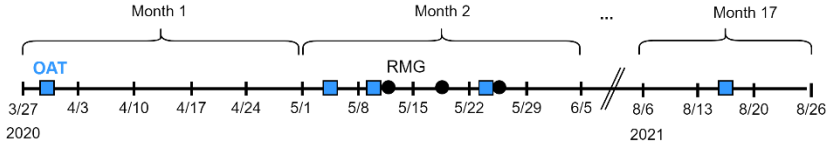

Individual 2 (never on RMG but OAT from month 2 to month 17)

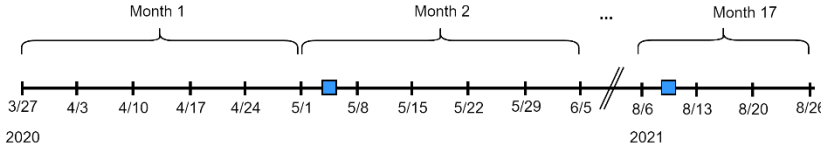

## Step 2. Create potential unexposed groups at each month on OAT until RMG initiation

Individual 1: one potential unexposed group at month 1 and an exposed group at month 2

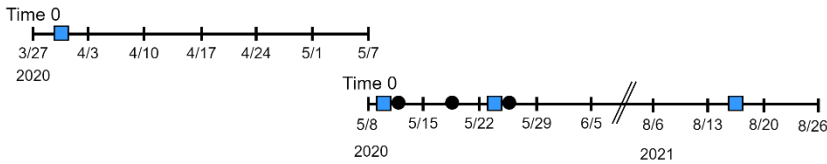

a potential unexposed group at month 1

an exposed group at month 2

Individual 2: 16 potential unexposed groups from month 2 to month 17

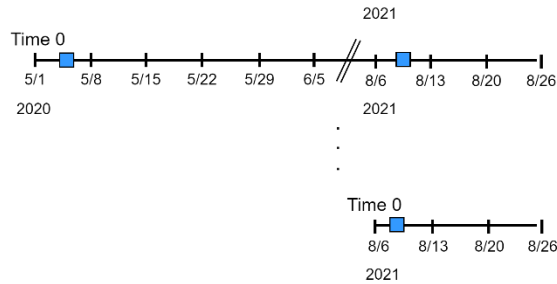

a potential unexposed group at month 2

⋮

a potential unexposed group at month 17

## Step 3. Perform monthly matching based on propensity score at time 0

Individual 1: one selected unexposed group at month 1 and an exposed group at month 2

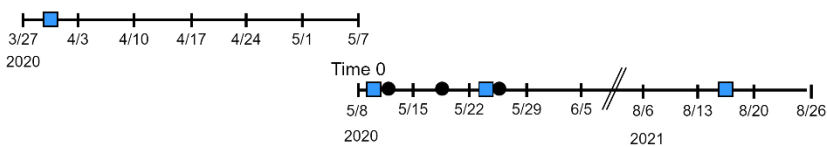

**selected** as an unexposed group at month 1

an exposed group at month 2

Individual 2: One selected unexposed group at month 2

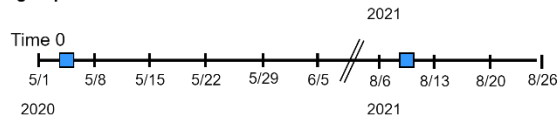

**selected** as an unexposed group at month 2

A black circle indicates opioid RMG receipt per week, and a blue square indicates OAT receipt per week.

**eFigure 2.** Distribution of Propensity Scores by Opioid RMG Receipt at Baseline

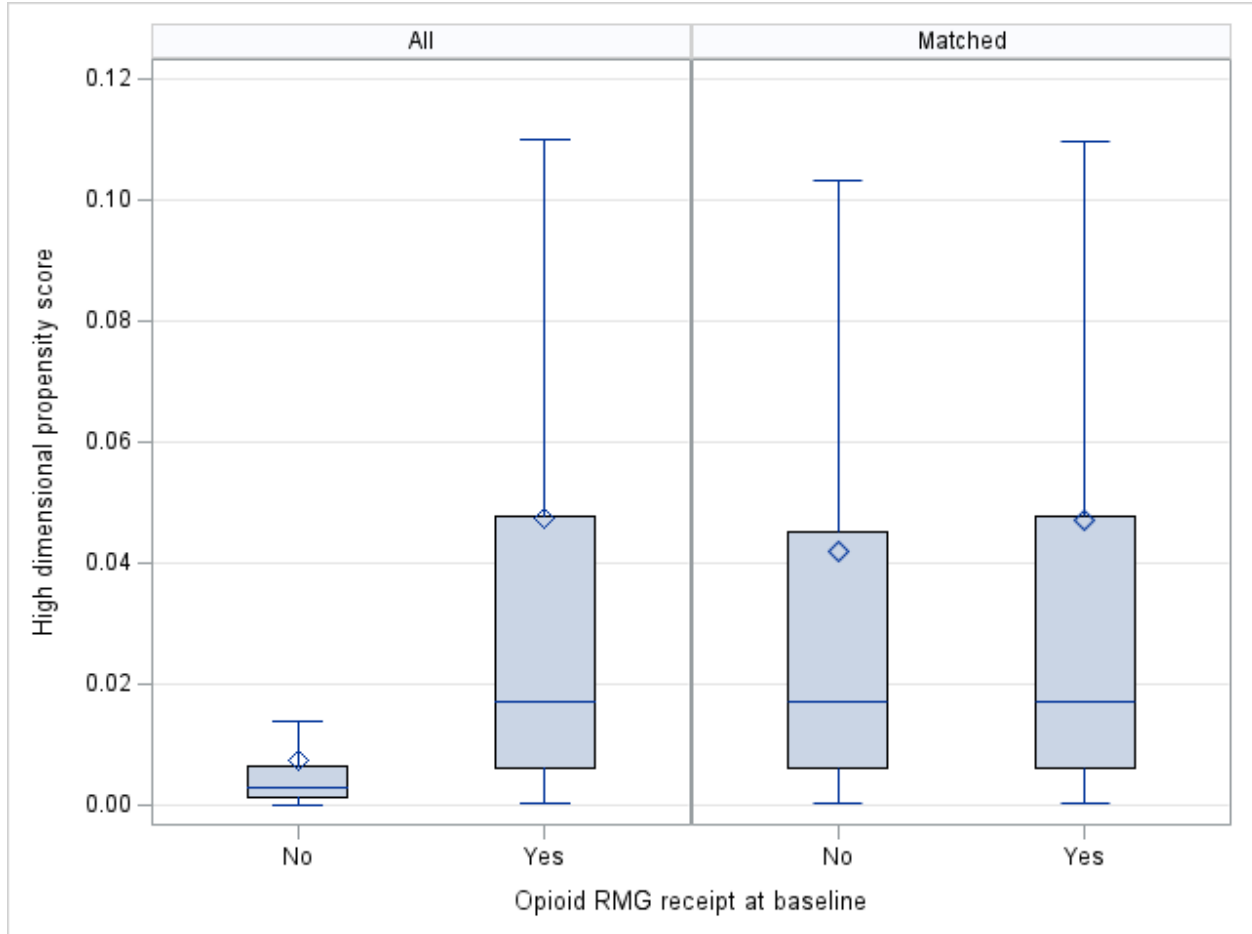

Each box plot displays the mean (as a diamond), median (middle horizontal bar) and the first and third quartiles (border horizontal bars). Vertical lines were drawn from the box to the most extreme point that was less than or equal to 1.5 times the intra-quartile range. The two distributions were well-balanced for the matched cohort at baseline.

**eTable 7.** Number of Individuals Before and After Matching per Month From Mar/Apr 2020 to Aug 2021

| Month Number | Month        | Before matching    |        | After matching     |       |
|--------------|--------------|--------------------|--------|--------------------|-------|
|              |              | Opioid RMG receipt |        | Opioid RMG receipt |       |
|              |              | Yes                | No     | Yes                | No    |
| 1            | Mar/Apr 2020 | 271                | 21,359 | 271                | 271   |
| 2            | May 2020     | 309                | 20,747 | 308                | 308   |
| 3            | June 2020    | 245                | 20,326 | 245                | 245   |
| 4            | July 2020    | 278                | 20,121 | 278                | 278   |
| 5            | Aug. 2020    | 257                | 19,809 | 257                | 257   |
| 6            | Sep. 2020    | 315                | 19,531 | 315                | 315   |
| 7            | Oct. 2020    | 394                | 19,608 | 394                | 394   |
| 8            | Nov. 2020    | 280                | 19,540 | 280                | 280   |
| 9            | Dec. 2020    | 249                | 19,456 | 249                | 249   |
| 10           | Jan. 2021    | 423                | 19,157 | 421                | 421   |
| 11           | Feb. 2021    | 296                | 19,410 | 296                | 296   |
| 12           | Mar. 2021    | 220                | 19,274 | 220                | 220   |
| 13           | April 2021   | 277                | 19,138 | 277                | 277   |
| 14           | May 2021     | 191                | 19,195 | 191                | 191   |
| 15           | June 2021    | 202                | 19,078 | 202                | 202   |
| 16           | July 2021    | 297                | 18,674 | 297                | 297   |
| 17           | Aug. 2021    | 132                | 18,558 | 132                | 132   |
| Overall      |              | 4,636              | 31,711 | 4,633              | 4,633 |

**eTable 8.** Odds Ratios and 95% Confidence Intervals From the Propensity Score Model on the RMG Initiation for January 2021

| Characteristics                                             | Odds ratio<br>(95% CI) | P-value |
|-------------------------------------------------------------|------------------------|---------|
| Sex: female vs. male                                        | 1.0 (0.8-1.2)          | 0.680   |
| Age: 18-29 vs. 50+                                          | 1.6 (1.1-2.3)          | 0.021   |
| 30-39                                                       | 1.8 (1.3-2.4)          | 0.001   |
| 40-49                                                       | 1.4 (1.0-2.0)          | 0.033   |
| Region: rural vs. urban                                     | 1.0 (0.7-1.4)          | 0.827   |
| Vancouver or South/Central Vancouver Island                 | 1.9 (1.5-2.3)          | <.0001  |
| Receipt of income assistance in the past year <sup>^</sup>  | 2.6 (1.9-3.5)          | <.0001  |
| Unstable housing in the past year <sup>†</sup>              | 1.6 (1.3-2.1)          | 0.000   |
| OAT in the last week: none vs. OAT guideline noncompliant   | 23.3 (16.2-33.4)       | <.0001  |
| OAT guideline compliant <sup>*</sup>                        | 1.9 (1.3-2.6)          | <.0001  |
| Years since OUD diagnosis: <5 vs. ≥10                       | 1.2 (0.9-1.6)          | 0.102   |
| 5-9                                                         | 1.0 (0.7-1.3)          | 0.307   |
| Charlson Comorbidity Index (CCI) > 0                        | 0.9 (0.6-1.5)          | 0.704   |
| Chronic Disease Score (CDS)                                 | 1.1 (0.9-1.2)          | 0.449   |
| Overdose-related acute care visits in the past month        | 2.1 (1.3-3.4)          | 0.004   |
| Other substance use disorder (ever) <sup>*§</sup>           | 1.5 (1.0-2.2)          | 0.028   |
| Alcohol use disorder (ever) <sup>*</sup>                    | 1.2 (0.9-1.5)          | 0.194   |
| Serious mental disorder(ever) <sup>* ¶</sup>                | 0.9 (0.7-1.2)          | 0.642   |
| HIV (ever) <sup>*</sup>                                     | 0.7 (0.4-1.2)          | 0.215   |
| Hepatitis C (ever) <sup>*</sup>                             | 1.3 (1.0-1.8)          | 0.062   |
| Chronic pain (past year) <sup>*</sup>                       | 0.8 (0.6-1.0)          | 0.043   |
| Tobacco use disorder (past year) <sup>*</sup>               | 0.7 (0.5-0.9)          | 0.010   |
| Any cancer or palliative care in the past year <sup>*</sup> | 0.9 (0.6-1.3)          | 0.547   |
| Incarcerated in the past year <sup>‡</sup>                  | 1.3 (0.8-1.9)          | 0.266   |
| Physician attachment: low GP use or single GP ≤50% vs. >50% | 2.0 (1.6-2.5)          | <.0001  |
| Dispensations opioid other than OAT in the past 60 days     | 3.4 (2.6-4.5)          | <.0001  |
| Dispensations of benzo medication in the past 60 days       | 0.5 (0.3-0.9)          | 0.023   |
| Dispensations of stimulant RMG                              | 0.9 (0.5-1.7)          | 0.789   |

*Abbreviations:* OAT: opioid agonist treatment; Opioid RMG: opioid risk mitigation guidance prescriptions (hydromorphone tablets or sustained-release oral morphine); PS: propensity score; hdPS: high dimensional propensity score, using also algorithm-selected covariates. <sup>^</sup> Plan C from PharmaNet or income assistance record from Ministry of Social Development and Poverty Reduction (SDPR). <sup>†</sup> ICD9: V60.0, V60.1; ICD10: Z59.0, Z59.1 from MSP or DAD or 3 consecutive records of no fixed address from SDPR. <sup>\*</sup> based on the maximum daily dose per week from the 4th week of OAT episode initiation (≥80mg for methadone; ≥16mg/3mg for buprenorphine/naloxone; ≥600mg for slow-release oral morphine; ≥200mg for injectable hydromorphone; ≥400mg for injectable diacetylmorphine; 100mg or 300mg per month for extended-release buprenorphine; ≥80mg for tablet injectable hydromorphone). <sup>‡</sup> Admission to BC correctional facilities. <sup>\*</sup> See Table A5 for ICD-9/ICD-10 codes used to identify concurrent chronic conditions. <sup>§</sup> Excludes opioid use disorder and alcohol use disorder. <sup>¶</sup> Includes major depressive disorder, bipolar disorder, and schizophrenia.

**eFigure 3.** Distribution of the Inverse Probability Weights for the Marginal Structural Model Among the hdPS-Matched Cohort

Panel A. Before truncation: mean=1.1; std dev=4.4

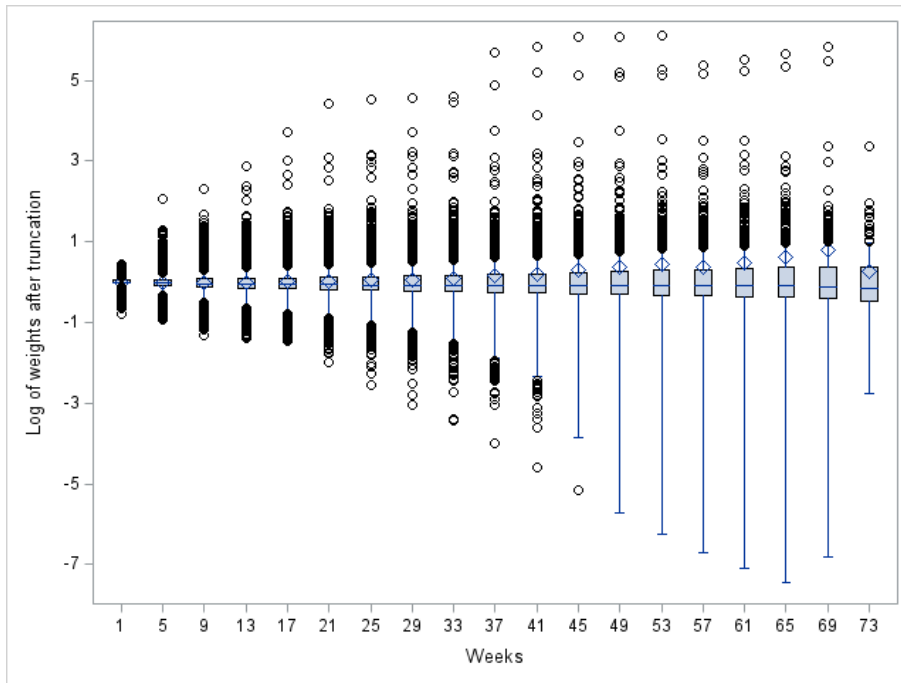

Panel B. After truncation at the first and 99<sup>th</sup> percentiles: mean=1.0; std dev=0.4

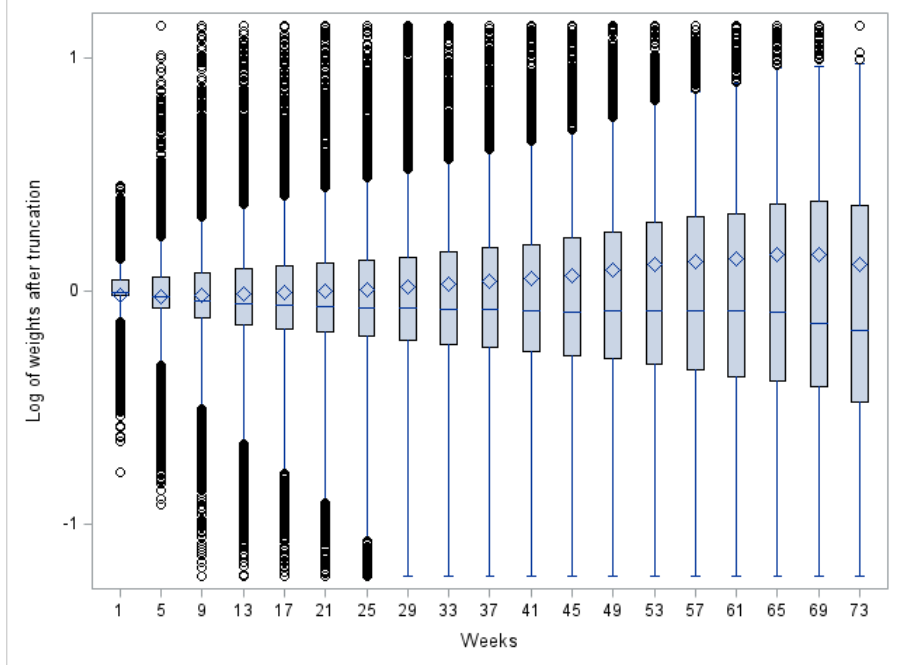

**eTable 9.** Risk Ratios and 95% Confidence Intervals From the Marginal Structural Outcome Models on OAT Receipt Among People on OAT at Time 0

| Characteristics <sup>a</sup>                                             | PS-matched cohort | hdPS-matched cohort |
|--------------------------------------------------------------------------|-------------------|---------------------|
| Opioid RMG: 1-3 days vs. none                                            | 1.26 (1.24-1.29)  | 1.27 (1.25-1.30)    |
| ≥ 4 days                                                                 | 1.45 (1.42-1.47)  | 1.46 (1.43-1.49)    |
| Sex: female vs. male                                                     | 0.92 (0.89-0.94)  | 0.93 (0.91-0.95)    |
| Age                                                                      | 1.00 (1.00-1.00)  | 1.00 (1.00-1.00)    |
| Region: rural vs. urban                                                  | 0.99 (0.95-1.03)  | 0.97 (0.93-1.01)    |
| Vancouver or South/Central Vancouver Island                              | 0.98 (0.96-1.01)  | 0.99 (0.97-1.02)    |
| Receipt of income assistance in the past year <sup>^ b</sup>             | 0.97 (0.94-1.00)  | 0.96 (0.93-0.99)    |
| Unstable housing in the past year <sup>† b</sup>                         | 0.93 (0.91-0.96)  | 0.94 (0.91-0.96)    |
| OAT in the last week <sup>b</sup> : none vs. OAT guideline noncompliant  | 0.73 (0.70-0.75)  | 0.74 (0.71-0.77)    |
| OAT guideline compliant <sup>‡</sup>                                     | 0.96 (0.94-0.99)  | 0.96 (0.93-0.99)    |
| Years since OUD diagnosis: <5 vs. ≥10                                    | 0.93 (0.90-0.96)  | 0.94 (0.91-0.97)    |
| 5-9                                                                      | 0.96 (0.92-0.99)  | 0.97 (0.94-1.01)    |
| Charlson Comorbidity Index (CCI) > 0 <sup>b</sup>                        | 0.99 (0.95-1.04)  | 0.99 (0.94-1.03)    |
| Chronic Disease Score (CDS) <sup>b</sup>                                 | 1.03 (1.01-1.05)  | 1.02 (1.01-1.04)    |
| Overdose-related acute care visits in the past month <sup>b</sup>        | 1.01 (0.95-1.06)  | 1.01 (0.96-1.07)    |
| Other substance use disorder (ever) <sup>*§ b</sup>                      | 1.02 (0.98-1.07)  | 1.02 (0.97-1.07)    |
| Alcohol use disorder (ever) <sup>* b</sup>                               | 1.00 (0.97-1.02)  | 1.00 (0.97-1.02)    |
| Serious mental disorder(ever) <sup>* ¶ b</sup>                           | 1.04 (1.01-1.07)  | 1.05 (1.02-1.08)    |
| HIV (ever) <sup>* b</sup>                                                | 0.96 (0.91-1.01)  | 0.95 (0.91-1.00)    |
| Hepatitis C (ever) <sup>* b</sup>                                        | 1.04 (1.01-1.07)  | 1.06 (1.03-1.09)    |
| Chronic pain (past year) <sup>* b</sup>                                  | 1.01 (0.99-1.04)  | 0.99 (0.96-1.02)    |
| Tobacco use disorder (past year) <sup>* b</sup>                          | 1.07 (1.04-1.10)  | 1.07 (1.04-1.10)    |
| Any cancer or palliative care in the past year <sup>* b</sup>            | 0.99 (0.95-1.03)  | 0.99 (0.95-1.03)    |
| Incarcerated in the past year <sup>‡ b</sup>                             | 0.88 (0.84-0.93)  | 0.88 (0.83-0.93)    |
| Physician attachment: low GP use or single GP ≤50% vs. >50% <sup>b</sup> | 0.92 (0.90-0.94)  | 0.93 (0.91-0.95)    |
| Dispensations opioid other than OAT in the past 60 days <sup>b</sup>     | 0.97 (0.94-1.00)  | 0.97 (0.94-1.00)    |
| Dispensations of benzo medication in the past 60 days <sup>b</sup>       | 1.01 (0.96-1.07)  | 1.00 (0.95-1.06)    |

*Abbreviations:* OAT: opioid agonist treatment; Opioid RMG: opioid risk mitigation guidance prescriptions (hydromorphone tablets or sustained-release oral morphine); PS: propensity score; hdPS: high dimensional propensity score, using also algorithm-selected covariates. <sup>^</sup> Plan C from PharmaNet or income assistance record from Ministry of Social Development and Poverty Reduction (SDPR). <sup>†</sup> ICD9: V60.0, V60.1; ICD10: Z59.0, Z59.1 from MSP or DAD or 3 consecutive records of no fixed address from SDPR. <sup>‡</sup> based on the maximum daily dose per week from the 4th week of OAT episode initiation (≥80mg for methadone; ≥16mg/3mg for buprenorphine/naloxone; ≥600mg for slow-release oral morphine; ≥200mg for injectable hydromorphone; ≥400mg for injectable diacetylmorphine; 100mg or 300mg per month for extended-release buprenorphine; ≥80mg for tablet injectable hydromorphone). <sup>‡</sup> Admission to BC correctional facilities. <sup>\*</sup> See Table A5 for ICD-9/ICD-10 codes used to identify concurrent chronic conditions. <sup>§</sup> Excludes opioid use disorder and alcohol use disorder. <sup>¶</sup> Includes major depressive disorder, bipolar disorder, and schizophrenia. <sup>a</sup> Baseline variable at time0 except for opioid RMG variables. <sup>b</sup> time-dependent variables used to calculate the denominator of weights in the marginal structural model.



**eTable 10.** The Effect of Opioid RMG Receipt on OAT Receipt Using hdPS-Matched Cohorts Without Weight Truncation

|                                                      | N <sup>b</sup> | Risk ratio (95% CI) for RMG vs. no RMG |                  |
|------------------------------------------------------|----------------|----------------------------------------|------------------|
|                                                      |                | RMG 1-3 days                           | RMG ≥ 4 days     |
| Primary analysis                                     | 4,633          | 1.24 (1.16-1.32)                       | 1.50 (1.45-1.56) |
| Subgroup analyses <sup>a</sup> :                     |                |                                        |                  |
| People initiating OAT and opioid RMG concurrently    | 2,352          | 1.51 (1.41-1.63)                       | 2.02 (1.92-2.13) |
| During OAT induction (up to 4 weeks)                 | 2,352          | 1.06 (1.03-1.09)                       | 1.42 (1.39-1.45) |
| People initiating OAT prior to opioid RMG initiation | 2,281          | 1.07 (1.05-1.09)                       | 1.14 (1.12-1.17) |
| People initiating/on methadone                       | 2,859          | 1.39 (1.19-1.63)                       | 1.56 (1.37-1.78) |
| People initiating/on buprenorphine/naloxone          | 427            | 1.38 (1.24-1.54)                       | 1.64 (1.47-1.83) |
| People initiating/on other forms of OAT              | 1,348          | 1.28 (1.22-1.34)                       | 1.63 (1.50-1.76) |

OAT: opioid agonist treatment; Opioid RMG: opioid risk mitigation guidance prescriptions (hydromorphone tablets or sustained-release oral morphine); hdPS: high dimensional propensity score matching, using investigated-selected covariates and algorithm-selected covariates. <sup>b</sup> Based on RMG initiation week for the exposure group and the matched unexposed group; <sup>b</sup> Number of individuals on RMG, matched with unexposed group. Marginal structural model with inverse probability of treatment weights. Controlling for: age, sex, rurality of residence, service access (Vancouver or South/Central Vancouver Island vs. others), income assistance receipt - past 12m, prior-week OAT dispensation (none, suboptimal, optimal), unstable housing – past 2 m, years since the first OUD indication (<5, 5-9, ≥10), overdose-related acute care visits – past 30 days, Charlson Comorbidity index (>0), Chronic Disease Score, any prior indication of disorder for substance use, alcohol use, mental health, HIV, Hepatitis C, chronic pain – past 12m, tobacco use - past 12m, any cancer/palliative care – past 12m, incarcerated – past 12m, physician attachment – past 12m, opioid dispensation other than OAT prescription – past 60 days, benzodiazepine dispensation – past 60 days, week of follow-up (linear & quadratic), and calendar month of time zero from 1 (Mar/April 2020) to 17 (Aug 2021) (linear & quadratic).

**eFigure 4.** E-Values for the Effect of Opioid RMG on OAT Receipt Using hdPS-Matched Control Among People on OAT at Time 0

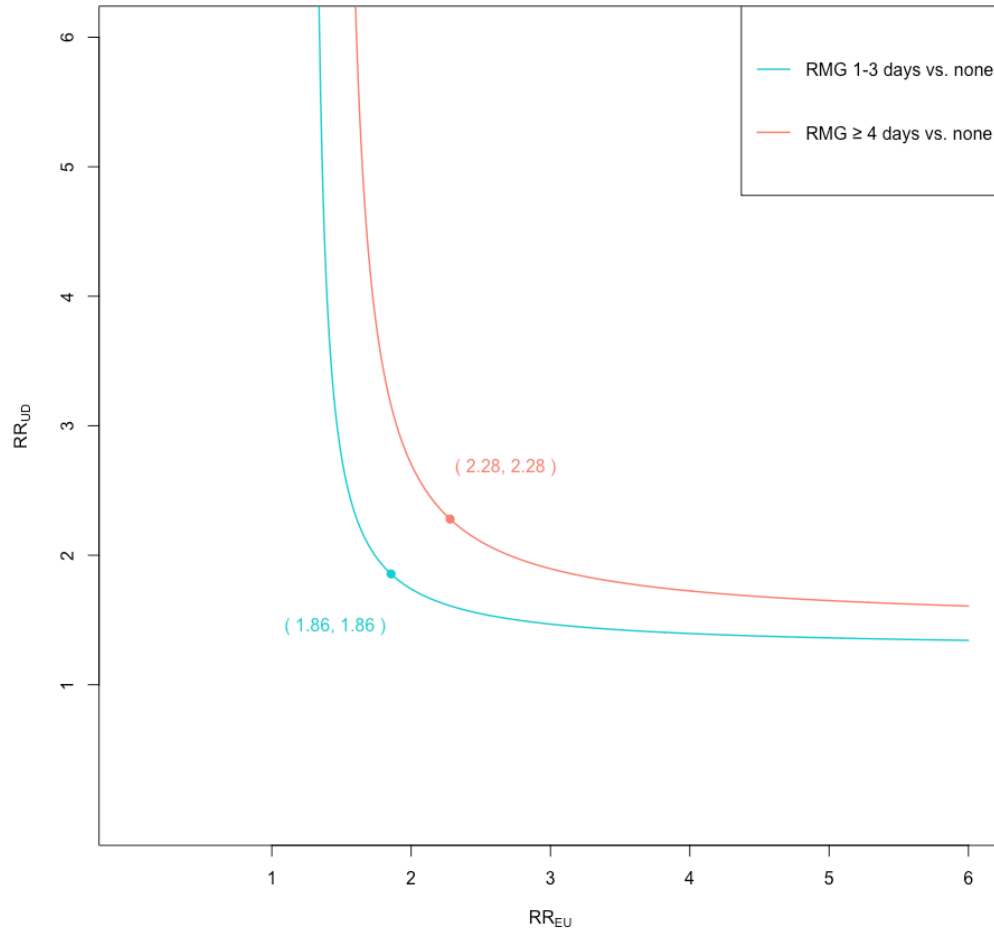

Legend: OAT: opioid agonist treatment; RMG: opioid risk mitigation guidance prescriptions (hydromorphone tablets or sustained-release oral morphine);  $RR_{UD}$ : risk ratio relating unmeasured confounders to OAT receipt;  $RR_{EU}$ : risk ratio relating to opioid RMG to unmeasured confounders; hdPS: high-dimensional propensity score matching, using algorithm-selected covariates.

**eTable 11.** Sensitivity Analysis on the Alternate Definition of Opioid RMG Receipt for Effect of OAT on Opioid RMG Receipt

| RMG definition                                                                                       | Risk ratio (95% CI) for RMG vs. no RMG |                  |
|------------------------------------------------------------------------------------------------------|----------------------------------------|------------------|
|                                                                                                      | Low RMG                                | High RMG         |
| Primary analysis: low: RMG 1-3; high: $\geq 4$ days                                                  | 1.27 (1.25-1.30)                       | 1.46 (1.43-1.49) |
| Sensitivity analyses:                                                                                |                                        |                  |
| Low: RMG 1-5; high: $\geq 6$ days                                                                    | 1.32 (1.29-1.35)                       | 1.47 (1.44-1.50) |
| Low: RMG <2000 MME, high: $\geq 2000$ MME                                                            | 1.31 (1.29-1.34)                       | 1.40 (1.37-1.43) |
| Low: current RMG 1-3; high: $\geq 4$ days, adjusting for cumulative RMG <sup>a</sup> in past 4 weeks | 1.24 (0.22-1.26)                       | 1.39 (1.36-1.41) |

Legend: OAT: opioid agonist treatment; RMG: opioid risk mitigation guidance prescriptions (hydromorphone tablets or sustained-release oral morphine); PS: propensity score matching, using investigator-selected covariates; hdPS: high dimensional propensity score matching, using also algorithm-selected covariates; MME: Morphine Equivalent weekly dosage dispensed. Marginal structural model with inverse probability of treatment weights. Controlling for: age, sex, rurality of residence, service access (Vancouver or South/Central Vancouver Island vs. others), income assistance receipt - past 12m, prior-week OAT dispensation (none, suboptimal, optimal), unstable housing – past 2 m, years since the first OUD indication (<5, 5-9,  $\geq 10$ ), overdose-related acute care visits – past 30 days, Charlson Comorbidity index (>0), Chronic Disease Score, any prior indication of disorder for substance use, alcohol use, mental health, HIV, Hepatitis C, chronic pain – past 12m, tobacco use - past 12m, any cancer/palliative care – past 12m, incarcerated – past 12m, physician attachment – past 12m, opioid dispensation other than OAT prescription – past 60 days, benzodiazepine dispensation – past 60 days, week of follow-up (linear & quadratic), and month of time zero from 1 to 17 (a linear & quadratic); <sup>a</sup> having at least a day of opioid RMG per week (a linear & quadratic terms).

## eReferences

1. British Columbia Centre on Substance Use. Risk Mitigation in the Context of Dual Public Health Emergencies: Update to Interim Clinical Guidance. 2022 [Available from: <https://www.bccsu.ca/wp-content/uploads/2022/02/Risk-Mitigation-Guidance-Update-February-2022.pdf>].
2. Nosyk B, Slaunwhite A, Urbanoski K, Hongdilokkul N, Palis H, Lock K, et al. Evaluation of risk mitigation measures for people with substance use disorders to address the dual public health crises of COVID-19 and overdose in British Columbia: a mixed-method study protocol. *BMJ Open*. 2021;11(6):e048353.
3. British Columbia Ministry of Health. B.C. Health System Strategy Geographic Service Areas 2016 [Available from: <https://www2.gov.bc.ca/assets/gov/health/about-bc-s-health-care-system/health-priorities/geographic-service-areas.docx>].
4. Peterson R, Gundlapalli AV, Metraux S, Carter ME, Palmer M, Redd A, et al. Identifying Homelessness among Veterans Using VA Administrative Data: Opportunities to Expand Detection Criteria. *PLoS One*. 2015;10(7):e0132664.
5. Provincial Health Services Authority. Identifying determinants for hospitalization based on healthcare utilization records. 2008 [Available from: <http://www.bccdc.ca/pop-public-health/Documents/Identifying%20determinants%20for%20hospitalization%20based%20on%20healthcare%20utilization%20records%20%282008%29.pdf>].
6. British Columbia Centre on Substance Use. Sublocade (Extended-Release Buprenorphine) Information 2022 [Available from: <https://www.bccsu.ca/wp-content/uploads/2022/01/Bulletin-Sublocade-Jan2022.pdf>].
7. British Columbia Centre on Substance Use. Opioid Use Disorder: Practice Update 2022 [Available from: <https://www.bccsu.ca/wp-content/uploads/2022/02/Opioid-Use-Disorder-Practice-Update-February-2022.pdf>].
8. British Columbia Centre on Substance Use and B.C. Ministry of Health. A Guideline for the Clinical Management of Opioid Use Disorder. 2017.
9. British Columbia Centre on Substance Use and B.C. Ministry of Health. Guidance for Injectable Opioid Agonist Treatment for Opioid Use Disorder. 2021.
10. Quan H, Sundararajan V, Halfon P, Fong A, Burnand B, Luthi JC, et al. Coding algorithms for defining comorbidities in ICD-9-CM and ICD-10 administrative data. *Med Care*. 2005;43(11):1130-9.
11. University of Manitoba. Concept: Charlson Comorbidity Index 2021 [Available from: <http://mchp-appserv.cpe.umanitoba.ca/viewConcept.php?conceptID=1098>].
12. Quan H, Li B, Saunders LD, Parsons GA, Nilsson CI, Alibhai A, et al. Assessing validity of ICD-9-CM and ICD-10 administrative data in recording clinical conditions in a unique dually coded database. *Health Serv Res*. 2008;43(4):1424-41.
13. Clark DO, Von Korff M, Saunders K, Baluch WM, Simon GE. A chronic disease score with empirically derived weights. *Med Care*. 1995;33(8):783-95.
14. BC Centre for Disease Control. Chronic Disease Dashboard: Case Definitions 2020 [Available from: <http://www.bccdc.ca/health-professionals/data-reports/chronic-disease-dashboard#Case-Definitions>].
15. British Columbia Ministry of Health. British Columbia Chronic Disease Registries (BCCDR): Methods Overview 2020 [Available from: <http://www.bccdc.ca/resource-gallery/Documents/Chronic-Disease-Dashboard/BC%20CDR%20Methodology%20Overview%202018-19.pdf>].
16. Alaghebandan R, Macdonald D, Barrett B, Collins K, Chen Y. Using administrative databases in the surveillance of depressive disorders--case definitions. *Popul Health Manag*. 2012;15(6):372-80.

17. Townsend L, Walkup JT, Crystal S, Olfson M. A systematic review of validated methods for identifying depression using administrative data. *Pharmacoepidem Dr S*. 2012;21:163-73.
18. Davis KA, Sudlow CL, Hotopf M. Can mental health diagnoses in administrative data be used for research? A systematic review of the accuracy of routinely collected diagnoses. *BMC Psychiatry*. 2016;16:263.
19. Oiesvold T, Nivison M, Hansen V, Sorgaard KW, Ostensen L, Skre I. Classification of bipolar disorder in psychiatric hospital. A prospective cohort study. *BMC Psychiatry*. 2012;12:13.
20. Sellgren C, Landen M, Lichtenstein P, Hultman CM, Langstrom N. Validity of bipolar disorder hospital discharge diagnoses: file review and multiple register linkage in Sweden. *Acta Psychiatr Scand*. 2011;124(6):447-53.
21. Kurdyak P, Lin E, Green D, Vigod S. Validation of a Population-Based Algorithm to Detect Chronic Psychotic Illness. *Can J Psychiatry*. 2015;60(8):362-8.
22. Goldner EM, Jones W, Waraich P. Using administrative data to analyze the prevalence and distribution of schizophrenic disorders. *Psychiatr Serv*. 2003;54(7):1017-21.
23. Nosyk B, Colley G, Yip B, Chan K, Heath K, Lima VD, et al. Application and validation of case-finding algorithms for identifying individuals with human immunodeficiency virus from administrative data in British Columbia, Canada. *PloS one*. 2013;8(1):e54416.
24. Shah H, Bilodeau M, Burak KW, Cooper C, Klein M, Ramji A, et al. The management of chronic hepatitis C: 2018 guideline update from the Canadian Association for the Study of the Liver. *CMAJ*. 2018;190(22):E677-E87.
25. Perrone V, Sangiorgi D, Buda S, Degli Esposti L. Disease progression and health care resource consumption in patients affected by hepatitis C virus in real practice setting. *Clinicoecon Outcomes Res*. 2016;8:591-7.
26. Kim D, Li AA, Gadiparthi C, Khan MA, Cholankeril G, Glenn JS, et al. Changing Trends in Etiology-Based Annual Mortality From Chronic Liver Disease, From 2007 Through 2016. *Gastroenterology*. 2018;155(4):1154-63.e3.
27. Sheu MJ, Chin TW, Ku FP, Li CY, Li ST, Lu TH. Validation of coding algorithms for identifying people with viral hepatitis using claims data according to different standard references. *BMC Infect Dis*. 2022;22(1):222.
28. Degenhardt L, Randall D, Hall W, Law M, Butler T, Burns L. Mortality among clients of a state-wide opioid pharmacotherapy program over 20 years: risk factors and lives saved. *Drug Alcohol Depend*. 2009;105(1-2):9-15.
29. Hagstrom H, Adams LA, Allen AM, Byrne CD, Chang Y, Gronbaek H, et al. Administrative Coding in Electronic Health Care Record-Based Research of NAFLD: An Expert Panel Consensus Statement. *Hepatology*. 2021;74(1):474-82.
30. Centers for Disease Control and Prevention. Alcohol-Related ICD Codes 2020 [Available from: <https://www.cdc.gov/alcohol/ardi/alcohol-related-icd-codes.html>].
31. Tian TY, Zlateva I, Anderson DR. Using electronic health records data to identify patients with chronic pain in a primary care setting. *J Am Med Inform Assoc*. 2013;20(e2):e275-80.
32. Tonelli M, Wiebe N, Fortin M, Guthrie B, Hemmelgarn BR, James MT, et al. Methods for identifying 30 chronic conditions: application to administrative data. *BMC Med Inform Decis Mak*. 2015;15:31.
33. Tonelli M, Wiebe N, Fortin M, Guthrie B, Hemmelgarn BR, James MT, et al. Correction to: Methods for identifying 30 chronic conditions: application to administrative data. *BMC Med Inform Decis Mak*. 2019;19(1):177.
34. Center of excellence for health systems improvement. ICD-10 Tobacco Billing Guide [Available from: [https://tobaccofreeny.org/images/PDFs/ICD-10\\_Tobacco\\_Billing\\_Guide.pdf](https://tobaccofreeny.org/images/PDFs/ICD-10_Tobacco_Billing_Guide.pdf)].

35. Government of British Columbia. Diagnostic Code Descriptions (ICD-9). [Available from: <https://www2.gov.bc.ca/gov/content/health/practitioner-professional-resources/msp/physicians/diagnostic-code-descriptions-icd-9>.
36. World Health Organization. International statistical classification of diseases and related health problems (10th ed.). 2019 [Available from: <https://icd.who.int/browse10/2019/en>.
37. Government of British Columbia. BC PharmaCare plans [Available from: <https://www2.gov.bc.ca/gov/content/health/health-drug-coverage/pharmacare-for-bc-residents/who-we-cover#planp>.
38. Schneeweiss S, Rassen JA, Glynn RJ, Avorn J, Mogun H, Brookhart MA. High-dimensional propensity score adjustment in studies of treatment effects using health care claims data. *Epidemiology*. 2009;20(4):512-22.
39. Rassen JA, Doherty M, Huang W, Schneeweiss S. *Pharmacoepidemiology Toolbox*. Boston, MA.2014 [Available from: <https://www.drugepi.org/dope/software#Pharmacoepidemiology>.
40. Rassen JA, Shelat AA, Myers J, Glynn RJ, Rothman KJ, Schneeweiss S. One-to-many propensity score matching in cohort studies. *Pharmacoepidemiol Drug Saf*. 2012;21 Suppl 2:69-80.
41. Austin P. Optimal Caliper Widths for Propensity-Score Matching When Estimating Differences in Means and Differences in Proportions in Observational Studies. *Pharmaceutical statistics*. 2011;10:150-61.
