# Supplementary material for: Opioid Coprescription Through Risk Mitigation Guidance and Opioid Agonist Treatment Receipt
Source: PubMed Central journal article supplement (PMC11096992; doi:10.1001/jamanetworkopen.2024.11389), 2024-05-15
Supplement: jamanetwopen-e2411389-s002.pdf [file jamanetwopen-e2411389-s002.pdf]

## Data Sharing Statement

Min. Opioid Coprescription Through Risk Mitigation Guidance and Opioid Agonist Treatment Receipt. *JAMA Netw Open*. Published May 15, 2024.

doi:10.1001/jamanetworkopen.2024.11389

### Data

**Data available:** No

### Additional Information

**Explanation for why data not available:** The datasets generated and/or analyzed during the current study are not publicly available due to concerns on individual level administrative data and privacy restrictions. Materials and code available on request.
